# Supplementary material for: Magnetic, Structural and Spectroscopic Properties of Iron(II)-Octacyanoniobate(IV) Crystalline Film Obtained by Ion-Exchange Synthesis
Source: MDPI journal article supplement (doi:10.3390/ma13133029), 2020-07-07
Supplement: s1 [file s1]

## Supporting Information:

# Magnetic, Structural and Spectroscopic Properties of Iron(II)-Octacyanonionobate(IV) Crystalline Film Obtained by Ion-Exchange Synthesis

Wojciech Sas <sup>1</sup>, Dawid Pinkowicz <sup>2</sup>, Marcin Perzanowski <sup>1</sup> and Magdalena Fitta <sup>1,\*</sup>

<sup>1</sup> Institute of Nuclear Physics Polish Academy of Sciences, Radzikowskiego 152, 31-342 Krakow, Poland; [Wojciech.Sas@ifj.edu.pl](mailto:Wojciech.Sas@ifj.edu.pl) (W.S.); [Marcin.Perzanowski@ifj.edu.pl](mailto:Marcin.Perzanowski@ifj.edu.pl) (M.P.)

<sup>2</sup> Faculty of Chemistry, Jagiellonian University, Gronostajowa 2, 30-387 Kraków, Poland; [dawid.pinkowicz@uj.edu.pl](mailto:dawid.pinkowicz@uj.edu.pl)

\* Correspondence: [Magdalena.Fitta@ifj.edu.pl](mailto:Magdalena.Fitta@ifj.edu.pl)

Received: 27 May 2020; Accepted: 2 July 2020; Published: date

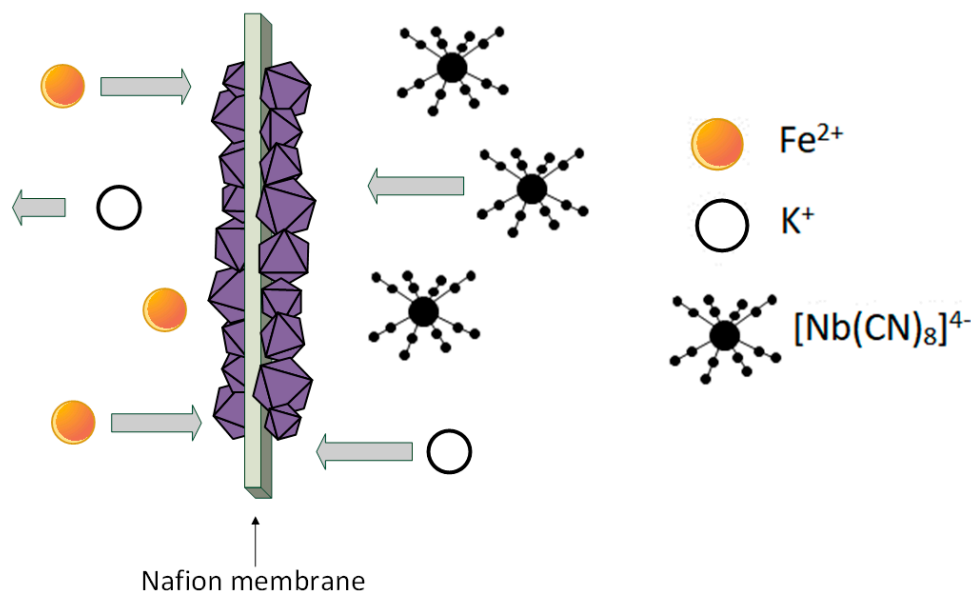

**Figure S1.** Schematic illustration of the growth process of  $[\text{Fe}^{\text{II}}(\text{H}_2\text{O})_2][\text{Nb}^{\text{IV}}(\text{CN})_8] \cdot 4\text{H}_2\text{O}$  crystalline film during ion exchange synthesis, where a transparent Nafion membrane is used as a solid substrate.

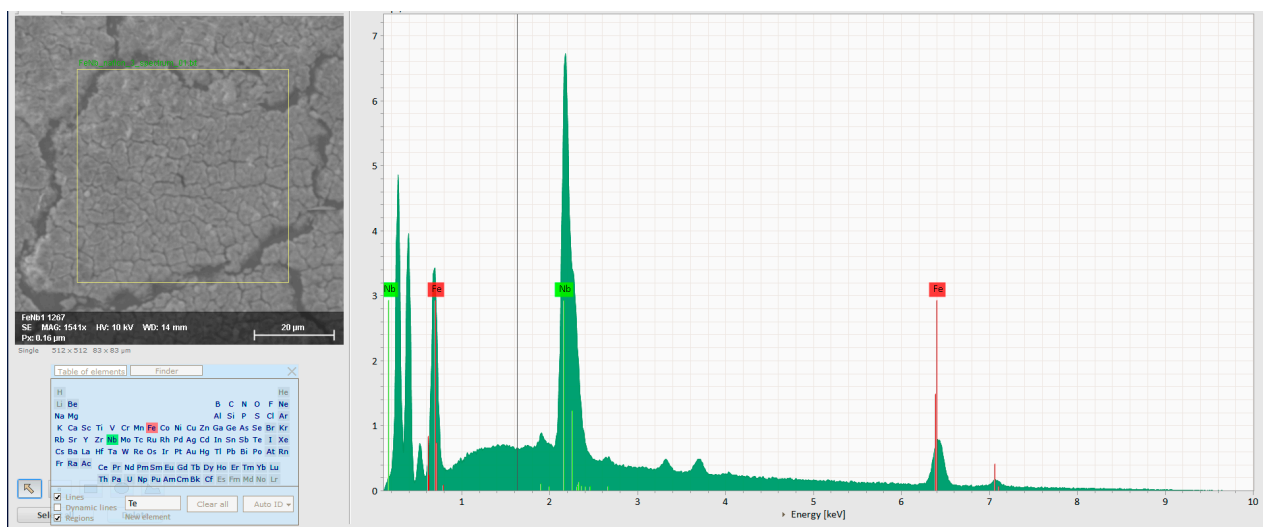

**Figure S2.** Energy dispersive x-ray spectroscopy (EDS) analysis data of  $[\text{Fe}^{\text{II}}(\text{H}_2\text{O})_2]_2[\text{Nb}^{\text{IV}}(\text{CN})_8] \cdot 4\text{H}_2\text{O}$  film deposited on the Nafion membrane during ion- exchange synthesis with the time 60s.

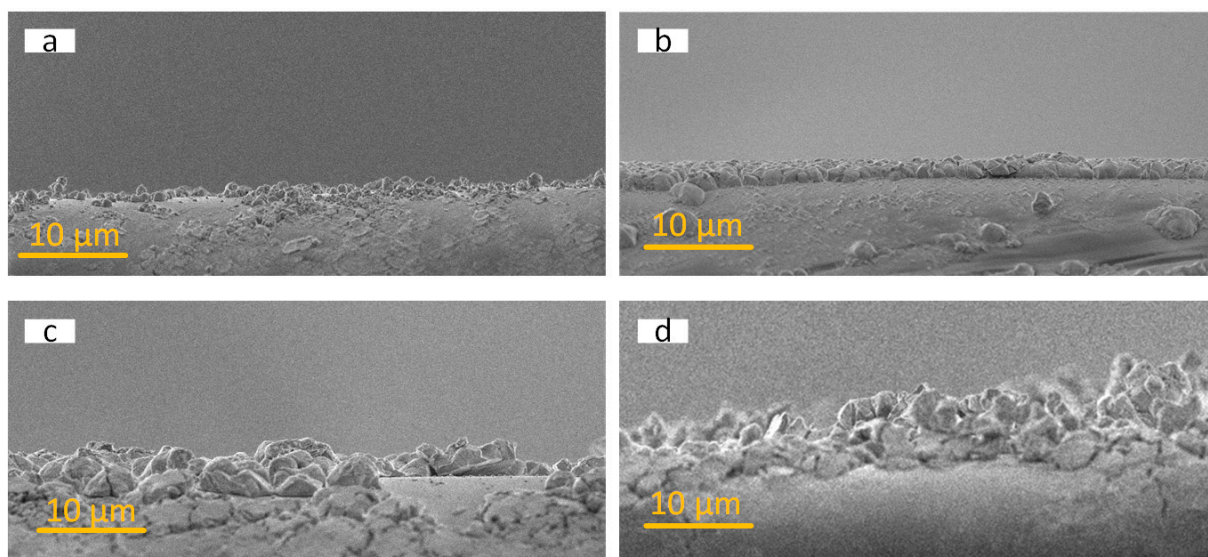

**Figure S3.** The cross section of the  $[\text{Fe}^{\text{II}}(\text{H}_2\text{O})_2]_2[\text{Nb}^{\text{IV}}(\text{CN})_8] \cdot 4\text{H}_2\text{O}$  film deposited on the Nafion membrane during ion-exchange synthesis with the time (a) 10s, (b) 30s, (c) 60s and (d) 180s.
